# Supplementary material for: Environmental Impact Assessment of Remediation Strategy in an Oil Spill in the Ecuadorian Amazon Region
Source: MDPI journal article supplement (doi:10.3390/pollutants1040019), 2021-11-28
Supplement: s1 [file s1]

Archive with 2 entries (2 files):
- Table S1_Pollutants.pdf
- Table S2_Pollutants.pdf
