# Supplementary material for: Environmental Impact Assessment of Remediation Strategy in an Oil Spill in the Ecuadorian Amazon Region
Source: MDPI journal article supplement (doi:10.3390/pollutants1040019), 2021-11-28
Supplement: s1 [file s1 › Table S2_Pollutants.pdf]

**Table S2.** Environmental impacts related to the manufacture of supplies and personal protection equipment in remediation activities. **ACRONYM:** CC: Climate change, **OD:** Ozone depletion, **HT:** Human toxicity, **PM:** Particulate matter, **IR:** Ionizing radiation, **EIR:** Ecosystem ionizing radiation, **POF:** Photochemical ozone formation, **AC:** Acidification, **TE:** Terrestrial eutrophication, **FWE:** Freshwater eutrophication, **ME:** Marine eutrophication, **FWEC:** Freshwater ecotoxicity, **LU:** Land use, **WRD:** Water resource depletion, **MFDP:** Mineral, fossil & ren resource depletion.

| Code in Ecoinvent database                                                            | Material in PPE and tools | Environmental category |    |    |    |    |     |     |    |    |     |    |      |    |     |      | Reference |
|---------------------------------------------------------------------------------------|---------------------------|------------------------|----|----|----|----|-----|-----|----|----|-----|----|------|----|-----|------|-----------|
|                                                                                       |                           | CC                     | OD | HT | PM | IR | EIR | POF | AC | TE | FWE | ME | FWEC | LU | WRD | MFDP |           |
| <i>Cotton fibre {RoW}  cotton production   Cut-off, U</i>                             | Cotton                    | X                      |    |    |    |    |     |     |    |    |     |    |      |    | X   | X    | [1]       |
| <i>Nylon 6 {RoW}  production   Cut-off, U</i>                                         | Polyamide                 | X                      |    |    |    |    |     | X   | X  |    | X   |    |      |    |     | X    | [2,3]     |
| <i>Synthetic rubber {RoW}  production   Cut-off, U</i>                                | Nitrile                   | X                      | X  |    |    |    |     |     | X  |    |     |    |      |    |     | X    | [4]       |
| <i>Polycarbonate {RoW}  production   Cut-off, U</i>                                   | Polycarbonate             | X                      | X  |    |    |    |     | X   | X  | X  | X   | X  |      |    |     | X    | [5]       |
| <i>Polyurethane, flexible foam {RoW}  production   Cut-off, U</i>                     | Hypoallergenic foam       | X                      | X  | X  | X  | X  |     | X   | X  |    |     |    | X    |    |     | X    | [6]       |
| <i>Polyester-complexed starch biopolymer {RoW}  production   Cut-off, U</i>           | Polyester                 | X                      | X  |    |    |    |     | X   | X  |    | X   |    |      |    |     | X    | [7]       |
| <i>Steel, low-alloyed {RoW}  steel production, electric, low-alloyed   Cut-off, U</i> | Antistatic steel          | X                      | X  | X  |    |    |     | X   | X  |    | X   |    |      |    |     | X    | [8]       |
| <i>Seal, natural rubber based {RoW}  production   Cut-off, U</i>                      | Rubber                    | X                      |    |    |    |    |     |     |    |    |     |    |      |    |     | X    | [9]       |
| <i>Polyvinylidenchloride, granulate {RoW}  production   Cut-off, U</i>                | Polyvinylidenchloride     | X                      |    | X  |    |    |     | X   | X  | X  | X   |    | X    |    |     | X    | [10]      |

1. Wendin, M. LCA of Recycling Cotton. Available online: [https://www.researchgate.net/publication/319710965\\_LCA\\_on\\_Recycling\\_Cotton](https://www.researchgate.net/publication/319710965_LCA_on_Recycling_Cotton) (accessed on 10 November 2021).
2. Sim, J.; Prabhu, V. The life cycle assessment of energy and carbon emissions on wool and nylon carpets in the United States. *J. Clean. Prod.* 2018, 170, 1231–1243. <https://doi.org/10.1016/j.jclepro.2017.09.203>.
3. Potting, J.; Blok, K. Life-cycle assessment of four types of floor covering. *J. Clean. Prod.* 1995, 3, 201–213. [https://doi.org/10.1016/0959-6526\(95\)00082-8](https://doi.org/10.1016/0959-6526(95)00082-8).
4. Soratana, K.; Rasutis, D.; Azarabadi, H.; Eranki, P.L.; Landis, A.E. Guayule as an alternative source of natural rubber: A comparative life cycle assessment with Hevea and synthetic rubber. *J. Clean. Prod.* 2017, 159, 271–280.
5. Altuwair, A. Environmental Performance Evaluation of Polycarbonates Production Processes. *Ind. Eng. Manag.* 2017, 6, 1–11. <https://doi.org/10.4172/2169-0316.1000214>.

6. EUROPUR. Flexible Polyurethane (PU) Foam. Eco-Profiles and Environmental Product Declarations of the European Plastics Manufacturers. Available online: [https://www.europur.org/images/20150821\\_EPD\\_EUROPUR\\_PU\\_foam.pdf](https://www.europur.org/images/20150821_EPD_EUROPUR_PU_foam.pdf) (accessed on 10 November 2020).
7. Patel, M.; Bastioli, C.; Marini, L.; Würdinger, E. Life-cycle Assessment of Bio-based Polymers and Natural Fiber Composites. In *Biopolymers Online*, 1st ed.; Wiley-VCH Verlag GmbH & Co. KGaA (Weinheim, Germany); pp. 1–14.
8. PE International Sustainability Performance. LCA Background Report for Steel Specialty Products Life Cycle Assessment Background Report in Support of an Environmental Product Declaration (EPD) for Steel Specialty Products. Available online: [http://www.gordon-inc.com/literature/pdf/cisca%20epd%20background%20report%20\(fe\)%202014-11-25.pdf](http://www.gordon-inc.com/literature/pdf/cisca%20epd%20background%20report%20(fe)%202014-11-25.pdf) (accessed on 10 February 2020).
9. Dunuwila, P.; Rodrigo, V.H.L.; Goto, N. Sustainability of natural rubber processing can be improved: A case study with crepe rubber manufacturing in Sri Lanka. *Resour. Conserv. Recycl.* **2018**, *133*, 417–427.
10. European Commission. Life Cycle Assessment of PVC and of principal competing materials. Available online: <https://fddocuments.in/document/pvc-final-report-lca-en.html> (accessed on 10 November 2021).
